# Supplementary material for: Tributyltin induces epigenetic changes and decreases the expression of nuclear respiratory factor-1
Source: Royal Society of Chemistry journal article supplement (doi:10.1039/c7mt00290d), 2018-01-01
Supplement: c7mt00290d1.pdf [file c7mt00290d1.pdf]

### Supplementary Figure Legends

**Figure S1.** Effect of TBT and GFP expression on mitochondrial membrane potential. SH-SY5Y cells were transfected with GFP and then treated without (A), with 100 nM TBT (B), or 300 nM TBT (C) for 3 days. The mitochondrial membrane potential was visualized using TMRE staining. Cells were imaged by three color fluorescence in green (GFP), red (TMRE), and blue (Hoechst). GFP expressing cells were indicated by arrows.

Scale bar: 20  $\mu\text{m}$ .
